# Supplementary material for: Administration of 3,5-diiodothyronine (3,5-T2) causes central hypothyroidism and stimulates thyroid-sensitive tissues
Source: PubMed Central journal article supplement (PMC4045230; doi:10.1530/joe-13-0502), 2014-06
Supplement: supp_JOE-13-0502_Supplementary_table_1.pdf [file supp_JOE-13-0502_Supplementary_table_1.pdf]

**Supplemental Table 1-** Oligonucleotide sequences used for qRT-PCR

| <b>Genes</b>   | <i>Forward</i>                        | <i>Reverse</i>                          |
|----------------|---------------------------------------|-----------------------------------------|
| <b>β-actin</b> | 5' – CACTTTCTACAATGAGCTGCG – 3'       | 5' – CTGGATGGCTACGTACATGG – 3'          |
| <b>D1</b>      | 5' – GTGATACAGGAAGGCAGGATC – 3'       | 5' – GAACGAAGGTCAAAGCTAAAGG – 3'        |
| <b>DUOX1</b>   | 5' – ATT TCT TGG GAG GTA CAG CG – 3'  | 5' – GTT AGG CAG GTA GGG TTC TTT C – 3' |
| <b>DUOX2</b>   | 5' – TGC TCT CAA CCC CAA AGT G – 3'   | 5' – TCT CAA ACC AGT AGC GAT CAC – 3'   |
| <b>NIS</b>     | 5' – GCTCATCCTGAACCAAGTGA – 3'        | 5' – ACGAGCATTACCACAACCTG – 3'          |
| <b>TPO</b>     | 5' – GAA TGA GGA ACT GAC CGA GAG – 3' | 5' – TGA CAA GCC ACA GAA CTC TC – 3'    |
| <b>TRH</b>     | 5'-GAA CGT CGA TTC TTG TGG AAA G-3'   | 5'-TTC TCC CAA GTC TCC CCT C-3'         |
| <b>TSHR</b>    | 5' – AGG TCC CTT GGA AAA ATG AGG – 3' | 5' – GTC TCG AGT AGC TTC AGA GTC – 3'   |

**-actin** (beta- actin), **D1** (type 1 deiodinase), **DUOX1** (Dual Oxidase 1), **DUOX2** (Dual Oxidase 2), **NIS** (sodium-iodide symporter), **TPO** (thyroperoxidase), **TRH** (thyrotrophic hormone), **TSHR** (thyrotropin receptor).
